# Supplementary material for: CRASH-3 - tranexamic acid for the treatment of significant traumatic brain injury: study protocol for an international randomized, double-blind, placebo-controlled trial
Source: PubMed Central journal article supplement (PMC3481366; doi:10.1186/1745-6215-13-87), 2012-06-21
Supplement: 1745-6215-13-87-S5.pdf [file 1745-6215-13-87-S5.pdf]

## CONSENT FORM FOR PATIENT AND REPRESENTATIVE THE CRASH-3 TRIAL

**Title of Research:** Tranexamic acid for the treatment of significant traumatic brain injury:  
an international randomised, double blind placebo controlled trial

|                            |  |                                            |     |      |  |  |
|----------------------------|--|--------------------------------------------|-----|------|--|--|
| Hospital code              |  | Local Principal Investigator               |     |      |  |  |
| Patient hospital ID number |  | Randomisation number                       |     |      |  |  |
|                            |  |                                            | BOX | PACK |  |  |
| Name of patient            |  | If representative, relationship to patient |     |      |  |  |

**Version Number: 1 / Version Date: 01/10/2011**

1. I confirm that I have read and understood the information sheet Version Number 1, version date 01/10/2011, for the above study and have had the opportunity to ask questions.
2. I understand that my consent is voluntary and that I am free to withdraw this consent at any time, without giving any reason and without my/the patient's medical care or any legal rights being affected.
3. I understand that sections of my/the patient's medical notes may be looked at by responsible individuals involved in the study. I give permission for these individuals to have access to these records.
4. I give permission for a copy of this consent form, which contains my/the patient's personal information, to be made available to the Trial Coordinating Centre in London for monitoring purposes only.
5. I give permission for my/the patient's personal doctor to be given information about participation in this trial.
6. I agree to me/the patient taking part in the above study, the CRASH-3 trial.

\_\_\_\_\_  
Name of Patient/Representative

\_\_\_\_\_  
Date

\_\_\_\_\_  
Signature (thumbprint or other mark if unable to sign)

\_\_\_\_\_  
Name of person taking consent

\_\_\_\_\_  
Date

\_\_\_\_\_  
Signature

\_\_\_\_\_  
Name of site Principal Investigator

\_\_\_\_\_  
Date

\_\_\_\_\_  
Signature

*The patient/representative is unable to sign. As a witness, I confirm that all the information about the trial was given and the patient/representative consented to taking part.*

\_\_\_\_\_  
Name of witness

\_\_\_\_\_  
Date

\_\_\_\_\_  
Signature

**Original to be filed in the Investigator's Study File**  
**1 copy for patient**  
**1 copy to be kept with patient's hospital records**
